# Supplementary material
Source: Springer Nature journal article supplement (https://www.springermedizin.de/resource/supplementary/12889_2012_5467_MOESM1_ESM.pdf/9495412)
Supplement: MOESM1 [file 9495412]

Venue Study

and

Personal Study

Intervention group

Control group I

Control group II

Control group III

Baseline  
0-3 months  
prior to  
implementation

167 Smoking  
venues/sections

56 Exposed  
hospitality workers

15 Smoking  
venues/sections

6 Exposed hospitality  
workers

11 Non-smoking  
venues

14 Non-exposed  
hospitality workers

16 Exposed non-  
hospitality workers

Implementation of new smoking regulation

Follow-up 1  
3-6 months  
after  
implementaion

37 Non-smoking  
venues

44 Non-exposed  
hospitality workers

14 Smoking  
venues/sections

2 Exposed hospitality  
workers

*No follow-up*

10 Exposed non-  
hospitality workers

Follow-up 2  
9-12 months  
after  
implementation

33 Non-smoking  
venues

42 Non-exposed  
hospitality workers

3 Smoking  
venues/sections

1 Exposed hospitality  
worker

5 Exposed non-  
hospitality workers
